# Supplementary material
Source: publisher figshare collection journal article supplement (https://acs.figshare.com/ndownloader/files/20168864)
Supplement: Supplementary file 1 [file 20168864]

## Supporting Information for

### Clarifying temporal trend variability in human biomonitoring of polybrominated diphenyl ethers through mechanistic modeling

Li Li<sup>1,\*§</sup>, Christopher Hoang<sup>1</sup>, Jon A. Arnot<sup>1,2,3</sup>, and Frank Wania<sup>1</sup>

1. Department of Physical & Environmental Sciences, University of Toronto Scarborough, Toronto, Ontario, Canada

2. ARC Arnot Research & Consulting, Toronto, Ontario, Canada

3. Department of Pharmacology and Toxicology, University of Toronto, Ontario, Canada

\* **Corresponding author at:** Department of Physical & Environmental Sciences, University of Toronto Scarborough, 1095 Military Trail, Toronto, Ontario, M1C 1A4, Canada;

E-mail address: [environ.li@mail.utoronto.ca](mailto:environ.li@mail.utoronto.ca) or [lili@unr.edu](mailto:lili@unr.edu) (L. Li).

§ **Current address:** School of Community Health Sciences, University of Nevada, Reno, 1664 N. Virginia Street, Reno NV, 89557, USA

This file contains 19 pages, 5 tables and 5 figures.

#### Contents

|                                                                                                                                                                             |    |
|-----------------------------------------------------------------------------------------------------------------------------------------------------------------------------|----|
| <b>Table S1.</b> Properties of PBDE congeners used in the simulation .....                                                                                                  | 2  |
| <b>Table S2.</b> Information on indoor and outdoor uses of PBDE congeners .....                                                                                             | 3  |
| <b>Table S3.</b> Emission factors of PBDE congeners used in the simulation .....                                                                                            | 4  |
| <b>Table S4.</b> Food consumption rates and exposure factors of a 25-year-old female Canadian.....                                                                          | 5  |
| <b>Table S5.</b> Modeled daily uptake rates ( $\mu\text{g d}^{-1}$ ) of PBDEs for a 6-year-old child and a 25-year-old adult in the years 2000 and 2010 .....               | 7  |
| <b>Figure S1</b> Modeled region: the Canadian side of the Lake Ontario watershed .....                                                                                      | 8  |
| <b>Figure S2.</b> Annual consumption (new use) of four PBDE congeners in the modeled region.....                                                                            | 9  |
| <b>Figure S3.</b> The impacts of model assumptions on the modeled within-age temporal trends in whole-body concentrations .....                                             | 10 |
| <b>Figure S4.</b> Modeled temporally variant concentrations of four BDE congeners between 1970 and 2050 and comparisons with observations documented in the literature..... | 12 |
| <b>Figure S5.</b> Additional calculations: Modeled within-age temporal trends in whole-body concentrations .....                                                            | 17 |

**Table S1.** Properties of PBDE congeners used in the simulation

| Property                                                                                         | Symbol                                        | BDE-47                | BDE-99                | BDE-153               | BDE-209               | Ref.            |
|--------------------------------------------------------------------------------------------------|-----------------------------------------------|-----------------------|-----------------------|-----------------------|-----------------------|-----------------|
| Molecular weight (g mol <sup>-1</sup> )                                                          | <i>MW</i>                                     | 486                   | 565                   | 644                   | 959                   |                 |
| Air-water equilibrium partition coefficient at 25°C (-)                                          | log <i>K</i> <sub>AW</sub>                    | -3.1                  | -3.4                  | -3.7                  | -4.8                  | <sup>1</sup>    |
| Octanol-air equilibrium partition coefficient at 25°C (-)                                        | log <i>K</i> <sub>OA</sub>                    | 10.4                  | 11.3                  | 12.1                  | 16.8                  | <sup>1</sup>    |
| Octanol-water equilibrium partition coefficient at 25°C (-)                                      | log <i>K</i> <sub>OW</sub>                    | 6.5                   | 7.0                   | 7.4                   | 10.0                  | <sup>1</sup>    |
| Internal energy of air-water phase transfer (kJ mol <sup>-1</sup> )                              | $\Delta U_{AW}$                               | 77                    | 79                    | 77                    | 65                    | <sup>1</sup>    |
| Internal energy of octanol-water phase transfer (kJ mol <sup>-1</sup> )                          | $\Delta U_{OW}$                               | -20                   | -12                   | -21                   | -80                   | <sup>1</sup>    |
| Internal energy of octanol-air phase transfer (kJ mol <sup>-1</sup> )                            | $\Delta U_{OA}$                               | -97                   | -91                   | -98                   | -145                  | <sup>1</sup>    |
| Atmospheric OH reaction rate constant (cm <sup>3</sup> molecules <sup>-1</sup> s <sup>-1</sup> ) | <i>k</i> <sub>OH</sub>                        | 1.0×10 <sup>-12</sup> | 5.5×10 <sup>-13</sup> | 5.5×10 <sup>-13</sup> | 3.4×10 <sup>-14</sup> | <sup>1</sup>    |
| Degradation rate constant in soil (h <sup>-1</sup> )                                             | <i>k</i> <sub>soil</sub>                      | 7.5×10 <sup>-5</sup>  | 4.1×10 <sup>-5</sup>  | 2.2×10 <sup>-5</sup>  | 9.1×10 <sup>-6</sup>  | <sup>1</sup>    |
| Degradation rate constant in sediment (h <sup>-1</sup> )                                         | <i>k</i> <sub>sed</sub>                       | 2.5×10 <sup>-5</sup>  | 1.4×10 <sup>-5</sup>  | 7.4×10 <sup>-6</sup>  | 3.0×10 <sup>-6</sup>  | <sup>1</sup>    |
| Degradation rate constant in water (h <sup>-1</sup> )                                            | <i>k</i> <sub>water</sub>                     | 1.5×10 <sup>-4</sup>  | 8.2×10 <sup>-5</sup>  | 4.4×10 <sup>-5</sup>  | 1.8×10 <sup>-5</sup>  | <sup>1</sup>    |
| Degradation rate constant in organic phase (h <sup>-1</sup> )                                    | <i>k</i> <sub>org</sub>                       | 1.5×10 <sup>-4</sup>  | 8.2×10 <sup>-5</sup>  | 4.4×10 <sup>-5</sup>  | 1.8×10 <sup>-5</sup>  | <sup>1</sup>    |
| Degradation rate constant in indoor surfaces (h <sup>-1</sup> )                                  | <i>k</i> <sub>surf</sub>                      | 0                     | 0                     | 0                     | 0                     | <sup>2</sup>    |
| Activation energy for atmospheric OH reaction (kJ mol <sup>-1</sup> )                            | <i>E</i> <sub>OH</sub>                        | 10                    | 10                    | 10                    | 10                    | Default         |
| Activation energy for degradation in soil (kJ mol <sup>-1</sup> )                                | <i>E</i> <sub>soil</sub>                      | 30                    | 30                    | 30                    | 30                    | Default         |
| Activation energy for degradation in sediment (kJ mol <sup>-1</sup> )                            | <i>E</i> <sub>sed</sub>                       | 30                    | 30                    | 30                    | 30                    | Default         |
| Activation energy for degradation in water (kJ mol <sup>-1</sup> )                               | <i>E</i> <sub>water</sub>                     | 30                    | 30                    | 30                    | 30                    | Default         |
| Activation energy for degradation in organic phase (kJ mol <sup>-1</sup> )                       | <i>E</i> <sub>org</sub>                       | 30                    | 30                    | 30                    | 30                    | Default         |
| Activation energy for degradation in indoor surfaces (kJ mol <sup>-1</sup> )                     | <i>E</i> <sub>surf</sub>                      | 30                    | 30                    | 30                    | 30                    | Default         |
| Normalized (10 g) organism biotransformation half-life (h)                                       | <i>t</i> <sub>1/2</sub> <sup>M,organism</sup> | 9.5×10 <sup>2</sup>   | 2.2×10 <sup>3</sup>   | 2.5×10 <sup>3</sup>   | 3.5×10 <sup>2</sup>   | <sup>3, 4</sup> |
| Normalized (70 kg) human biotransformation half-life (h)                                         | <i>t</i> <sub>1/2</sub> <sup>M,human</sup>    | 1.5×10 <sup>4</sup>   | 4.3×10 <sup>3</sup>   | 5.3×10 <sup>4</sup>   | 2.9×10 <sup>2</sup>   | <sup>5</sup>    |

**Table S2.** Information on indoor and outdoor uses of PBDE congeners

|         | Fraction in indoor use <sup>(1)</sup> | Indoor use                            |                                       | Outdoor use                           |                                       |
|---------|---------------------------------------|---------------------------------------|---------------------------------------|---------------------------------------|---------------------------------------|
|         |                                       | Scale parameter (year) <sup>(2)</sup> | Shape parameter (year) <sup>(3)</sup> | Scale parameter (year) <sup>(2)</sup> | Shape parameter (year) <sup>(3)</sup> |
| BDE-47  | 100%                                  | 9.1                                   | 2.4                                   | -                                     | -                                     |
| BDE-99  | 100%                                  | 10.7                                  | 2.4                                   | -                                     | -                                     |
| BDE-153 | 80%                                   | 8.6                                   | 2.4                                   | 2.5                                   | 2.4                                   |
| BDE-209 | 55%                                   | 5.8                                   | 2.4                                   | 5.5                                   | 2.4                                   |

Notes:

(1) Calculated based on the distribution of the technical PBDE mixtures among five main applications (taken from Abbasi et al.<sup>6</sup>)

|            | Indoor use                          |          |         | Outdoor use |              |
|------------|-------------------------------------|----------|---------|-------------|--------------|
|            | Electrical and electronic equipment | PUF Foam | Textile | Automobile  | Construction |
| C-pentaBDE | 5-10%                               | 90-95%   |         |             |              |
| C-octaBDE  | 80%                                 |          |         | 20%         |              |
| C-decaBDE  | 35%                                 |          | 20%     | 35%         | 10%          |

(2) Averages of the lifespans of electrical and electronic equipment (9.1 years), PUF foam (11.9 years), textiles (11.2 years), automobiles (12.0 years) and construction (12.5 years), weighted by the fractions of the technical mixtures used in individual applications. The lifespans are averages of related articles taken from the “Lifespan Database for Vehicles, Equipment, and Structures (LiVES)” ([www.nies.go.jp/lifespan](http://www.nies.go.jp/lifespan)).

(3) Default values in Abbasi et al.<sup>6</sup>

**Table S3.** Emission factors of PBDE congeners used in the simulation

| Lifecycle stage      | Receiving compartment            | BDE-47               | BDE-99               | BDE-153              | BDE-209                             |
|----------------------|----------------------------------|----------------------|----------------------|----------------------|-------------------------------------|
| Industrial processes | Rural; air <sup>(1)</sup>        | $1.6 \times 10^{-3}$ | $2.7 \times 10^{-4}$ | $4.6 \times 10^{-4}$ | $1.8 \times 10^{-4}$                |
|                      | Rural; soil <sup>(1)</sup>       | $8.8 \times 10^{-5}$ | $1.5 \times 10^{-5}$ | $2.5 \times 10^{-5}$ | $1.0 \times 10^{-5}$                |
|                      | Rural; freshwater <sup>(1)</sup> | $7.0 \times 10^{-5}$ | $1.2 \times 10^{-5}$ | $2.0 \times 10^{-5}$ | $8.0 \times 10^{-6}$                |
| Indoor use           | Indoor; air <sup>(2)</sup>       | $7.3 \times 10^{-5}$ | $1.5 \times 10^{-5}$ | $3.9 \times 10^{-6}$ | $3.5 \times 10^{-5}$ <sup>(3)</sup> |
| Outdoor use          | Urban; air <sup>(2)</sup>        | $7.3 \times 10^{-5}$ | $1.5 \times 10^{-5}$ | $3.9 \times 10^{-6}$ | $6.3 \times 10^{-7}$ <sup>(4)</sup> |
| Waste disposal       | Rural; air <sup>(5)</sup>        | $3.9 \times 10^{-4}$ | $3.9 \times 10^{-5}$ | $5.0 \times 10^{-5}$ | $6.1 \times 10^{-6}$                |
|                      | Rural; freshwater <sup>(5)</sup> | $1.0 \times 10^{-5}$ | $1.0 \times 10^{-7}$ | $1.0 \times 10^{-7}$ | $1.0 \times 10^{-9}$                |

Notes:

- (1) Emission factors to air are taken from Schenker et al.<sup>1</sup> (for congeners other than BDE-209) and Abbasi et al.<sup>7</sup> (for BDE209; the geometric mean of emission factors in their high and low scenarios). Emission factors to soil and freshwater are extrapolated based on the surveyed data documenting that 91%, 5.5% and 3.5% of PBDE (based on decaBDE) emissions enter air (including both fugitive and stack emissions), land (soil), and freshwater, respectively.<sup>8</sup> Note that the emission factor to freshwater represents the fraction after wastewater treatment in manufacturing facilities.
- (2) Calculated using an empirical relationship,  $\log EF = -0.839 \times \log K_{OA} (20^\circ\text{C}) + 4.83$ , given in ref.<sup>9</sup>, except for BDE-209.
- (3) Average of emission factors for textiles ( $9.5 \times 10^{-5}$ )<sup>1</sup> and plastics ( $6.3 \times 10^{-7}$ ; average of the three measurements in Table 2 of ref.<sup>10</sup>), weighted by the respective fractions of regional total *indoor* consumption (55% of the total PBDE consumption) used in textiles (20%) and electrical and electronic equipment (35%).<sup>6</sup>
- (4) Emission factor from plastics; average of the three measurements in Table 2 of ref.<sup>10</sup>
- (5) Average of emission factors from landfills and dumpsites, incineration facilities (to air only), and recycling sites (to air only) (taken from Abbasi et al.<sup>7</sup>), weighted by their relative importance in Ontario (60%, 15% and 25%). All landfill leachate is assumed to enter freshwater.

**Table S4.** Food consumption rates and exposure factors of a 25-year-old female Canadian  
The model extrapolates the food consumption rates and exposure factors to other ages based on empirical relationships with human body weight<sup>11</sup> (69.8 kg for the 25-year-old female Canadian<sup>12</sup>).

| <b>Food consumption (m<sup>3</sup> d<sup>-1</sup>)</b> |                          |
|--------------------------------------------------------|--------------------------|
| Planktivorous fish                                     | 4.7×10 <sup>-6</sup> (1) |
| Piscivorous fish                                       | 1.4×10 <sup>-5</sup> (1) |
| Vegetables                                             | 5.2×10 <sup>-4</sup> (2) |
| Beef                                                   | 5.5×10 <sup>-5</sup> (3) |
| Dairy products                                         | 2.5×10 <sup>-4</sup> (4) |
| <b>Ingestion of environmental media</b>                |                          |
| Air (m <sup>3</sup> d <sup>-1</sup> )                  | 15.3 <sup>12</sup>       |
| Drinking water (L d <sup>-1</sup> ) <sup>(5)</sup>     | 3 <sup>(6)</sup>         |
| Soil (mg d <sup>-1</sup> )                             | 20 <sup>12</sup>         |
| Indoor dust (mg d <sup>-1</sup> )                      | 20 <sup>13</sup>         |
| <b>Time-activity relationship</b>                      |                          |
| Fraction of time spent indoors                         | 98% <sup>12</sup>        |

Notes:

- (1) Converted from statistics of the annual fish consumption rate of 6.8 kg per person, per year by Ontario residents (obtained from [www.dfo-mpo.gc.ca](http://www.dfo-mpo.gc.ca)), assuming that the fish consumption is composed of 25% planktivorous fish and 75% piscivorous fish. According to a Statista survey (<https://www.statista.com/statistics/948509/types-of-fish-eaten-at-home-canada/>), salmon (66% of respondents; piscivorous) and tuna (53% of respondents; planktivorous and piscivorous) are the two most popular types of fish consumed by Canadians. According to Fisheries and Oceans Canada, the eastern Pacific is the main commercial fisheries landing region for salmon and tuna, which produces 30 times more salmon and tuna than the Atlantic (See statistics between 2015 and 2017 below; <http://www.dfo-mpo.gc.ca/stats/commercial/sea-maritimes-eng.htm>).

| Year | Eastern Pacific                      | Atlantic                                |
|------|--------------------------------------|-----------------------------------------|
| 2017 | 14722 (12893 t salmon + 1829 t tuna) | 892 t (0 t of salmon and 892 t of tuna) |
| 2016 | 26896 (24058 t salmon + 2838 t tuna) | 671 t (0 t of salmon and 671 t of tuna) |
| 2015 | 24362 (20064 t salmon + 4298 t tuna) | 879 t (0 t of salmon and 879 t of tuna) |

- (2) Taken from statistics of *the Canadian Community Health Survey: Overview of Canadians' Eating Habits*. The number is for combined vegetables and fruits.
- (3) Converted from statistics of protein disappearance of animal protein sources (boneless weight) in Canada (i.e., food available per person, per year) (obtained from the Canadian Agri-food Sector Intelligence [www.agr.gc.ca](http://www.agr.gc.ca)). Average (20.1 kg per person, per year) of yearly data for 2000–2010.
- (4) Converted from statistics of annual fluid milk and cream consumption of 91 liters per person, per

year by Ontario residents (obtained from [www.dairyinfo.gc.ca](http://www.dairyinfo.gc.ca)). Assume that the milk contains 5.5% of lipid content.

(5) We do not consider the loss of PBDEs during the treatment of drinking water.

(6) Model default value.

**Table S5.** Modeled daily uptake rates ( $\mu\text{g d}^{-1}$ ) of PBDEs for a 6-year-old child and a 25-year-old adult in the years 2000 and 2010

|                        | 6-year-old child |           | 25-year-old adult |           |
|------------------------|------------------|-----------|-------------------|-----------|
|                        | Year 2000        | Year 2010 | Year 2000         | Year 2010 |
| BDE-47                 | 3.88             | 2.61      | 0.89              | 0.60      |
| BDE-99                 | 1.09             | 0.92      | 0.25              | 0.25      |
| BDE-153                | 0.09             | 0.05      | 0.10              | 0.07      |
| BDE-209                | 2.67             | 2.82      | 0.62              | 0.70      |
| $\Sigma 4\text{PBDEs}$ | 7.73             | 6.40      | 1.86              | 1.62      |

**Figure S1** Modeled region: the Canadian side of the Lake Ontario watershed

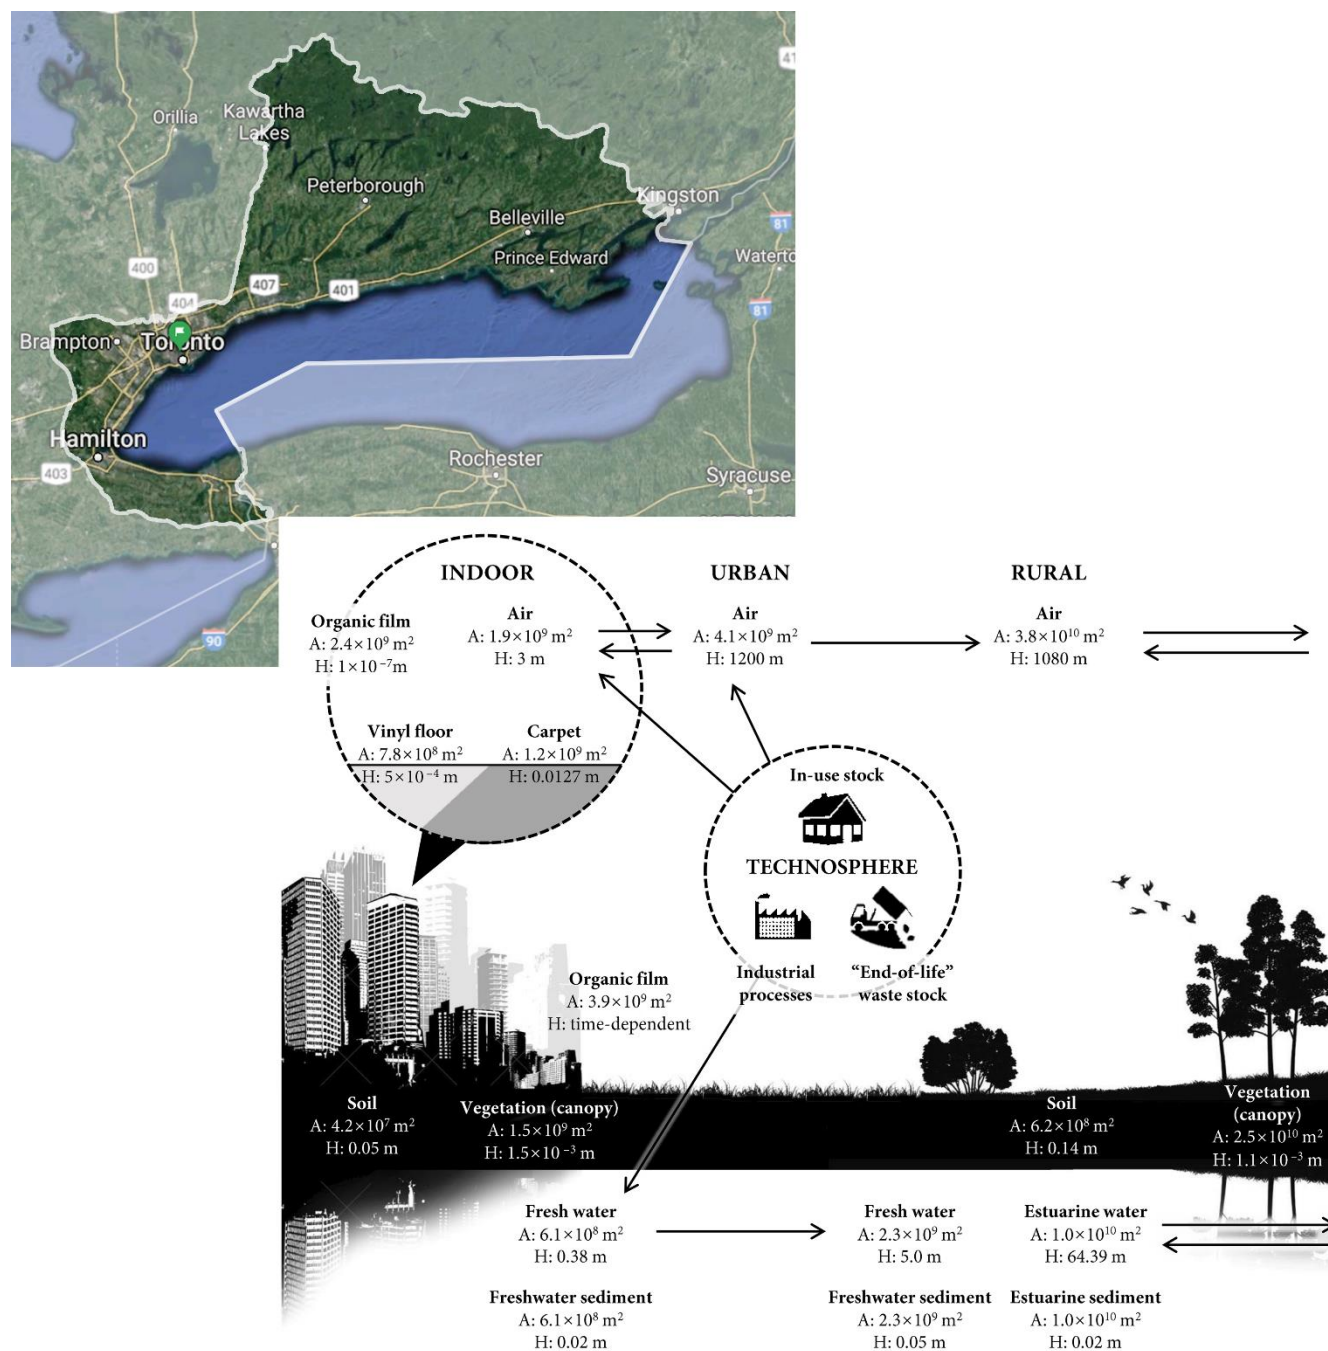

The chemical exchange between indoor and urban air is characterized using an air exchange rate of  $0.75 \text{ h}^{-1}$  (default in the RAIDAR-ICE model<sup>14</sup>) and that between urban and rural air is characterized using an atmospheric residence time in the urban and rural air compartments of 28.3 h (default in the ChemCAN model<sup>15</sup>).



**Figure S2.** Annual consumption (new use) of four PBDE congeners in the modeled region  
Extrapolated from the total consumptions in North America<sup>7</sup> based on the fraction of the North American population living in the modeled region.

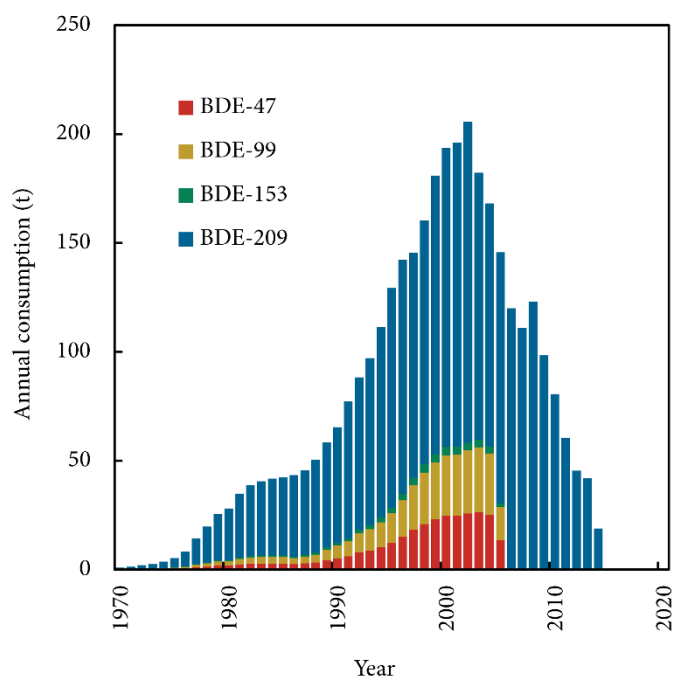

**Figure S3.** The impacts of model assumptions on the modeled within-age temporal trends in whole-body concentrations

(I) Comparison between modeled  $t_{1/2}$  of BDE-47 (Panels a and b) and BDE-153 (Panels c and d) for adults (Panels a and c) and children (Panels b and d) under assumptions that the degradation rate constant in waste stock is the same as that in sediment (default in this study; green solid curves) or that in soil (red dashed curves). Note that using a degradation rate constant in soil, which is faster than that in sediment, leads to lower whole-body concentrations; however, the change in the calculated  $t_{1/2}$  is minor.

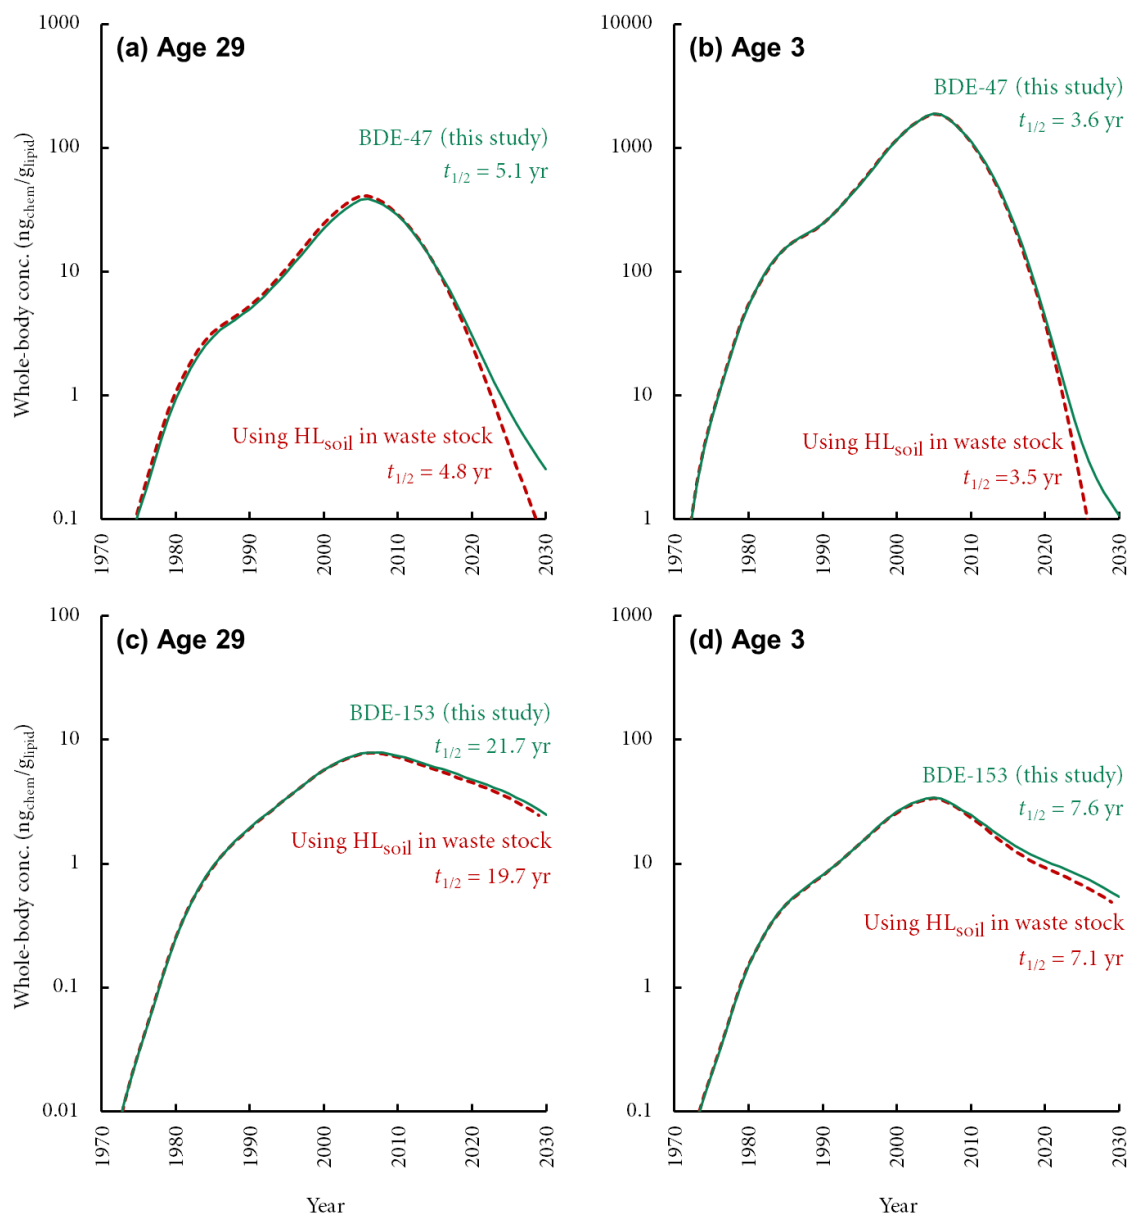

(II) Comparison between modeled  $t_{1/2}$  of BDE-47 (Panels a and b) and BDE-153 (Panels c and d) for adults (Panels a and c) and children (Panels b and d) under assumptions that all aquatic food is sourced from the coastal eastern Pacific, i.e., cell #52 of BETR-Global (default in this study; green solid curves) or from the Atlantic, i.e., cell #58 of BETR-Global (red dashed curves). Note that assuming all aquatic food to be sourced from the Atlantic, which is more contaminated than the coastal eastern Pacific, leads to higher whole-body concentrations; however, the change in the calculated  $t_{1/2}$  is minor.

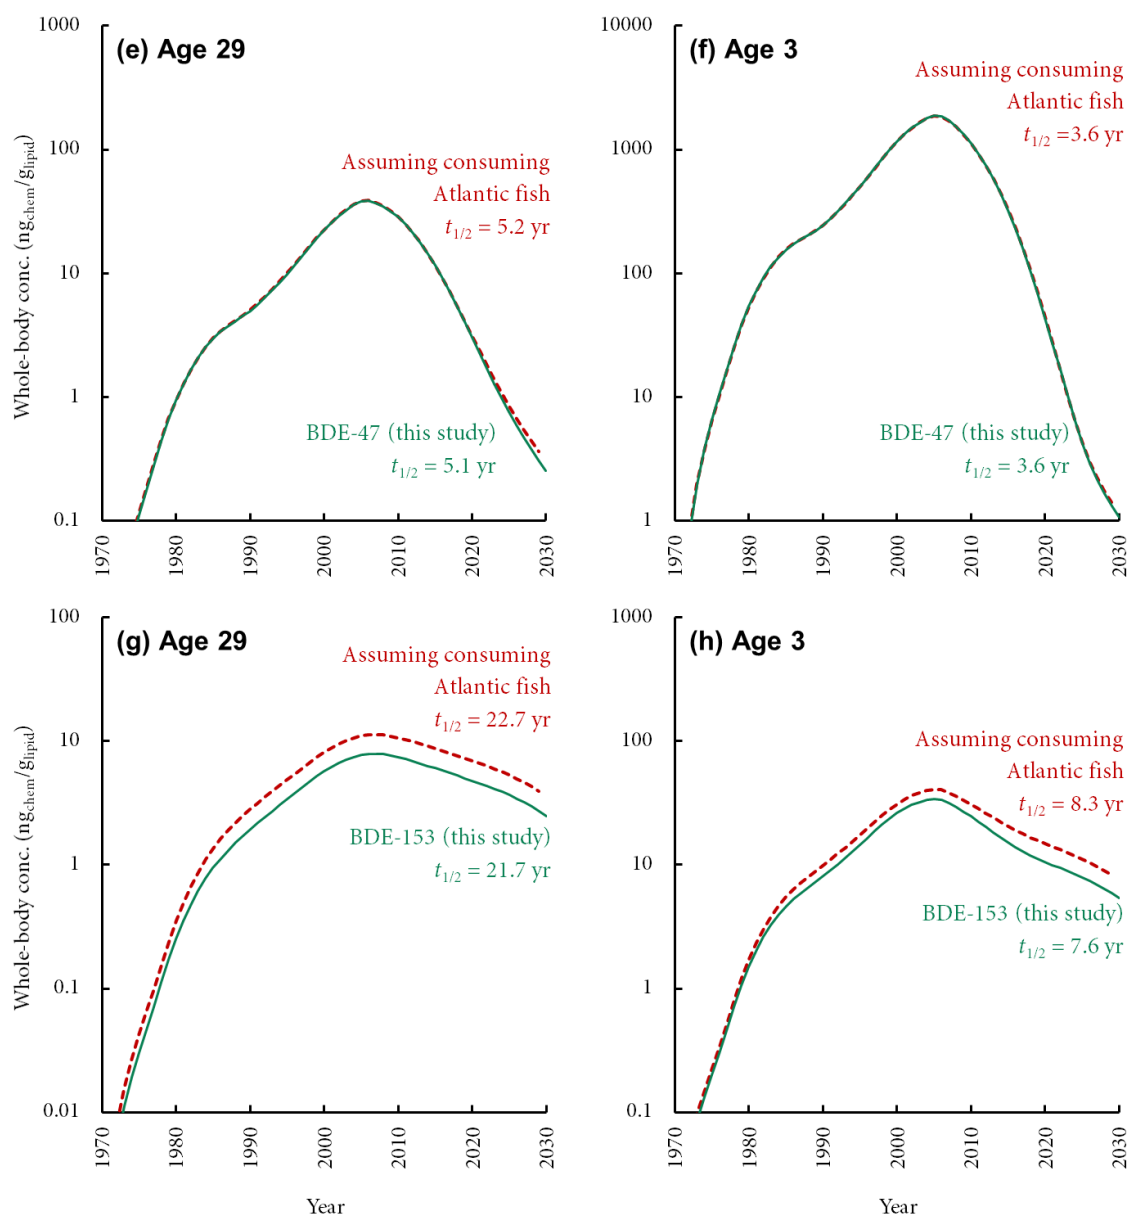

**Figure S4.** Modeled temporally variant concentrations of four BDE congeners between 1970 and 2050 and comparisons with observations documented in the literature  
(Panels a to d for indoor air, panels e to h for urban air, panels i to l for rural air, and panels m to p for marine fish)

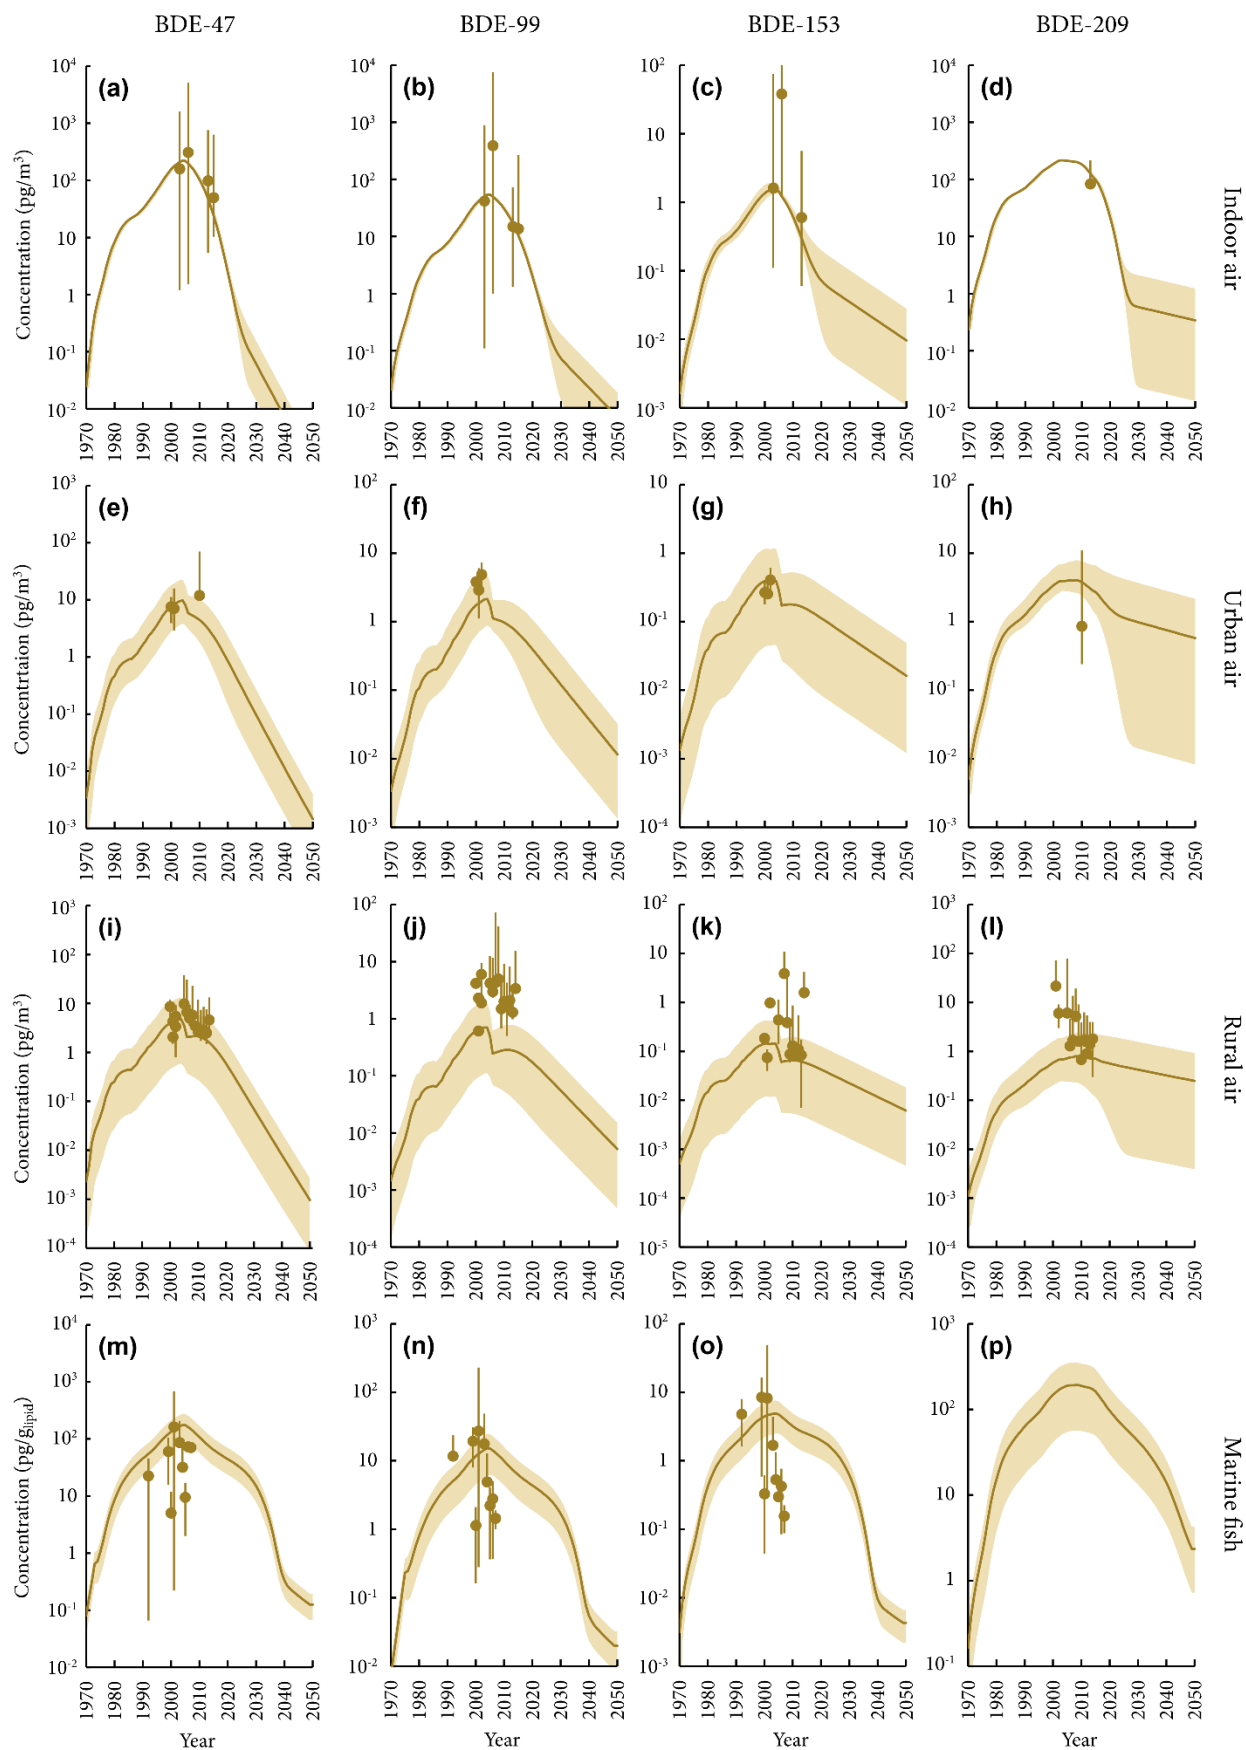

Notes:

For modeled concentrations, the curves represent the annual means and the shaded bands represent the ranges due to seasonal variation.

Below tabulate observed and modeled concentrations used for comparisons in Figure S4. Observed concentrations are given in “mean  $\pm$  standard deviation (minimum – maximum)” (n.d. = not detected or below the limit of detection/determination, whichever is reported in the literature); modeled concentrations are given in “mean (minimum – maximum)”.

| <b>Indoor air</b> (in pg/m <sup>3</sup> ) |                         |                              |                              |                               |                           |
|-------------------------------------------|-------------------------|------------------------------|------------------------------|-------------------------------|---------------------------|
| Year                                      |                         | BDE-47                       | BDE-99                       | BDE-153                       | BDE-209                   |
| 2002-2003                                 | Observed <sup>16</sup>  | 160 $\pm$ 290<br>(n.d.–1600) | 42 $\pm$ 110<br>(n.d.–890)   | 1.6 $\pm$ 8.7<br>(n.d.–74)    |                           |
|                                           | Modeled                 | 210<br>(192–217)             | 51<br>(46–52)                | 1.5<br>(1.3–2.0)              | 216<br>(213–218)          |
| 2006                                      | Observed <sup>2</sup>   | 310 $\pm$ 1100<br>(1.5–5100) | 390 $\pm$ 1700<br>(1.0–7500) | 38 $\pm$ 150<br>(1.2–670)     |                           |
|                                           | Modeled                 | 197<br>(194–217)             | 50<br>(49–53)                | 1.2<br>(1.1–1.4)              | 208<br>(208–210)          |
| 2013                                      | Observed <sup>17</sup>  | 99 $\pm$ 27<br>(5.4–759)     | 1.5 $\pm$ 3.3<br>(1.3–73)    | 0.06 $\pm$ 0.17<br>(0.06–5.7) | 83 $\pm$ 31<br>(n.d.–217) |
|                                           | Modeled                 | 47<br>(45–61)                | 17<br>(15–21)                | 0.3<br>(0.2–0.5)              | 126<br>(123–144)          |
| 2015                                      | Observed <sup>18*</sup> | 94 $\pm$ 120<br>(10–630)     | 26 $\pm$ 52<br>(N.D.–370)    |                               |                           |
|                                           | Modeled                 | 24<br>(22–33)                | 10<br>(9–13)                 | 0.2<br>(0.1–0.3)              | 97<br>(94–108)            |

\* Concentrations based on PUF passive air samplers.

| <b>Urban air</b> (in pg/m <sup>3</sup> ) |                         |                           |                            |                                |                     |
|------------------------------------------|-------------------------|---------------------------|----------------------------|--------------------------------|---------------------|
| Year                                     |                         | BDE-47                    | BDE-99                     | BDE-153                        | BDE-209             |
| 2000                                     | Observed <sup>19†</sup> | 9.5<br>(7.7–11.2)         | 4.3<br>(3.9–4.6)           | 0.2<br>(0.18–0.25)             |                     |
|                                          | Modeled                 | 7.7<br>(2.8–18)           | 1.7<br>(0.6–4.1)           | 0.4<br>(0.1–1.2)               | 3.4<br>(2.3–6.0)    |
| 2001                                     | Observed <sup>19†</sup> | 7.3 $\pm$ 3.8<br>(3.1–15) | 3.1 $\pm$ 1.3<br>(1.5–5.8) | 0.25 $\pm$ 0.13<br>(n.d.–0.39) |                     |
|                                          | Modeled                 | 8.3<br>(3.1–19)           | 1.9<br>(0.7–4.3)           | 0.4<br>(0.1–1.2)               | 3.6<br>(2.5–6.4)    |
| 2010-2011                                | Observed <sup>20‡</sup> | 12<br>(2–58)              |                            |                                | 0.86<br>(0.62–10.1) |

|         |            |           |            |           |
|---------|------------|-----------|------------|-----------|
| Modeled | 4.4        | 1.0       | 0.2        | 3.8       |
|         | (1.8–10.2) | (0.5–2.1) | (n.d.–0.5) | (2.4–7.6) |

† Concentrations reported at sampling sites Gage, Junction, and S. Riverdare.

‡ Numbers are read from Figure 1 of Shoeib et al.<sup>20</sup> because no numeric data are available.

|      |                         | <b>Rural air</b> (in pg/m <sup>3</sup> ) |                       |                           |                            |
|------|-------------------------|------------------------------------------|-----------------------|---------------------------|----------------------------|
| Year |                         | BDE-47                                   | BDE-99                | BDE-153                   | BDE-209                    |
| 2000 | Observed <sup>19§</sup> | 4.7<br>(4.1–5.3)                         | 3.0<br>(2.4–3.6)      | 0.12<br>(0.06–0.18)       |                            |
|      | Modeled                 | 4.0<br>(0.5–11)                          | 0.6<br>(0.1–1.7)      | 0.1<br>(0.01–0.4)         | 0.6<br>(0.2–1.6)           |
| 2001 | Observed <sup>19§</sup> | 6.5<br>(1.5–15.2)                        | 1.9<br>(0.5–3.5)      | 0.2<br>(0.04–0.31)        |                            |
|      | Modeled                 | 4.0<br>(0.5–11)                          | 0.6<br>(0.1–1.7)      | 0.1<br>(0.01–0.4)         | 0.6<br>(0.2–1.7)           |
| 2002 | Observed <sup>21</sup>  | 5.5<br>(n.d.–10.3)                       | 1.9<br>(n.d.–5.9)     |                           | 16<br>(n.d.–105)           |
|      | Modeled                 | 4.4<br>(0.5–12)                          | 0.7<br>(0.1–1.9)      | 0.1<br>(0.01–0.4)         | 0.7<br>(0.2–1.9)           |
| 2005 | Observed <sup>22</sup>  | 7.7 ± 6.7<br>(1.6–26)                    | 3.7 ± 4.2<br>(1.0–23) | 0.88 ± 0.97<br>(0.2–2.0)  | 1.1 ± 1.3<br>(0.11–6.5)    |
|      | Modeled                 | 3.6<br>(0.5–9.6)                         | 0.5<br>(0.1–1.3)      | 0.1<br>(0.01–0.3)         | 0.7<br>(0.2–2.1)           |
| 2006 | Observed <sup>22</sup>  | 6.7 ± 6.2<br>(1.3–31)                    | 4.1 ± 3.8<br>(1.3–17) | 0.88 ± 0.30<br>(0.67–1.2) | 1.5 ± 2.2<br>(0.084–12)    |
|      | Modeled                 | 2.1<br>(0.4–5.5)                         | 0.2<br>(0.1–0.6)      | 0.06<br>(0.01–0.2)        | 0.8<br>(0.2–2.2)           |
| 2007 | Observed <sup>22</sup>  | 17 ± 54<br>(0.6–290)                     | 22 ± 92<br>(1.0–500)  | 16 ± 22<br>(0.87–49)      | 0.75 ± 0.68<br>(0.092–3.4) |
|      | Modeled                 | 2.1<br>(0.3–5.6)                         | 0.3<br>(0.1–0.7)      | 0.06<br>(0.01–0.2)        | 0.8<br>(0.2–2.2)           |
| 2008 | Observed <sup>22</sup>  | 17 ± 32<br>(0.14–170)                    | 17 ± 53<br>(0.2–900)  | 7.5 ± 8.9<br>(0.52–23)    | 1.7 ± 4.6<br>(0.1–25)      |
|      | Modeled                 | 2.1<br>(0.3–5.8)                         | 0.3<br>(0.1–0.7)      | 0.06<br>(0.01–0.2)        | 0.8<br>(0.2–2.4)           |
| 2009 | Observed <sup>22</sup>  | 11 ± 14<br>(0.82–54)                     | 11 ± 20<br>(0.65–66)  | 0.95 ± 2.0<br>(0.028–6.3) | 0.81 ± 0.78<br>(0.024–3.0) |
|      | Modeled                 | 2.2<br>(0.3–5.8)                         | 0.3<br>(0.1–0.7)      | 0.07<br>(0.01–0.2)        | 0.8<br>(0.2–2.3)           |

|      |                        |                        |                       |                           |                            |
|------|------------------------|------------------------|-----------------------|---------------------------|----------------------------|
| 2010 | Observed <sup>22</sup> | 10 ± 14<br>(0.9–48)    | 11 ± 24<br>(0.58–110) | 1.2 ± 2.5<br>(0.029–10)   | 0.5 ± 0.58<br>(0.024–1.7)  |
|      | Modeled                | 2.1<br>(0.3–5.8)       | 0.3<br>(0.1–0.8)      | 0.07<br>(0.01–0.2)        | 0.8<br>(0.2–2.3)           |
| 2011 | Observed <sup>22</sup> | 20 ± 34<br>(1.8–140)   | 27 ± 66<br>(1.1–260)  | 5.6 ± 9.4<br>(0.047–24)   | 1.2 ± 0.84<br>(0.28–3.0)   |
|      | Modeled                | 2.0<br>(0.2–5.6)       | 0.3<br>(0.1–0.8)      | 0.07<br>(0.01–0.2)        | 0.8<br>(0.2–2.3)           |
| 2012 | Observed <sup>22</sup> | 7.5 ± 6.1<br>(19–24)   | 5.3 ± 10<br>(0.72–40) | 0.48 ± 1.1<br>(0.011–3.7) | 0.34 ± 0.24<br>(0.069–0.8) |
|      | Modeled                | 1.9<br>(0.2–5.3)       | 0.3<br>(0.1–0.8)      | 0.06<br>(0.01–0.2)        | 0.7<br>(0.1–2.3)           |
| 2013 | Observed <sup>22</sup> | 6.9 ± 6.9<br>(0.74–14) | 11 ± 12<br>(0.58–21)  | 1.4 ± 1.1<br>(0.068–2.1)  | 0.12                       |
|      | Modeled                | 1.8<br>(0.2–4.9)       | 0.3<br>(0.1–0.8)      | 0.06<br>(0.01–0.2)        | 0.7<br>(0.1–2.3)           |

§ Concentrations reported at sampling sites Aurora and Egbert.

| <b>Marine fish</b> (in pg/g <sub>lipid</sub> ) |                         |                       |                         |                   |                 |
|------------------------------------------------|-------------------------|-----------------------|-------------------------|-------------------|-----------------|
| Year                                           |                         | BDE-47                | BDE-99                  | BDE-153           | BDE-209         |
| 1992                                           | Observed <sup>23#</sup> | 23<br>(6.1–64)        | 12<br>(3.1–32)          | 6.4<br>(n.d.–8.9) |                 |
|                                                | Modeled                 | 55<br>(27–86)         | 5.1<br>(2.0–8.3)        | 2.2<br>(1.1–3.4)  | 74<br>(21–135)  |
| 1999-2000                                      | Observed <sup>24★</sup> | 5.0 ± 5.0<br>(1.5–14) | 1.1 ± 0.9<br>(n.d.–2.4) | 0.3<br>(n.d.–0.3) |                 |
|                                                | Modeled                 | 123<br>(61–193)       | 11<br>(4.1–18)          | 4.2<br>(2.1–6.5)  | 137<br>(38–251) |
| 2000                                           | Observed <sup>23#</sup> | 60<br>(27–160)        | 19<br>(7.7–46)          | 8.5<br>(3.4–26)   |                 |
|                                                | Modeled                 | 135<br>(67–212)       | 12<br>(4.5–20)          | 4.4<br>(2.2–6.9)  | 148<br>(41–271) |
| 2003                                           | Observed <sup>25¶</sup> | 87 ± 62               | 18 ± 16                 | 1.7 ± 1.4         |                 |
|                                                | Modeled                 | 166<br>(85–262)       | 15<br>(5.7–23)          | 4.8<br>(2.5–7.5)  | 178<br>(51–324) |
| 2003                                           | Observed <sup>25¶</sup> | 32 ± 23               | 4.9 ± 4.0               | 0.5 ± 0.4         |                 |
|                                                | Modeled                 | 166<br>(85–262)       | 15<br>(5.7–23)          | 4.8<br>(2.5–7.5)  | 178<br>(51–324) |
| 2005                                           | Observed <sup>25¶</sup> | 9.5 ± 3.8             | 2.2 ± 0.1               | 0.3 ± 0.2         |                 |

|      |                         |                 |                |                  |                 |
|------|-------------------------|-----------------|----------------|------------------|-----------------|
|      | Modeled                 | 174<br>(94–274) | 15<br>(6.3–25) | 4.8<br>(2.5–7.4) | 189<br>(54–345) |
| 2005 | Observed <sup>25¶</sup> | 73 ± 14         | 2.8 ± 2.3      | 0.4 ± 0.3        |                 |
|      | Modeled                 | 174<br>(94–274) | 15<br>(6.3–25) | 4.8<br>(2.5–7.4) | 189<br>(54–345) |
| 2007 | Observed <sup>25¶</sup> | 71 ± 2.2        | 1.4 ± 0.2      | 0.2 ± 0.0        |                 |
|      | Modeled                 | 148<br>(79–233) | 13<br>(5.7–21) | 4.1<br>(2.2–6.3) | 191<br>(56–350) |

# Concentrations measured in Sole fish.

★ Concentrations measured in wild Salmons. Covered to lipid weight-based concentrations from wet weight-based concentrations reported in Easton et al.<sup>24</sup>

¶ Covered to lipid weight-based concentrations from wet weight-based concentrations reported in Ikonomou et al.<sup>25</sup> Data from sampling sites of West Coast Vancouver Island, Robson Bight Johnstone Strait, and Fraser River are used.



**Figure S5.** Additional calculations: Modeled within-age temporal trends in whole-body concentrations (Panel a) adults; assuming that BDE-153 has a shorter biotransformation half-life of 1.8 years; (Panel b) children; assuming that the rate of growth is zero; (Panel c) children; assuming no postnatal (lactation transfer) and prenatal (*in utero* trans-placental transfer) exposures.

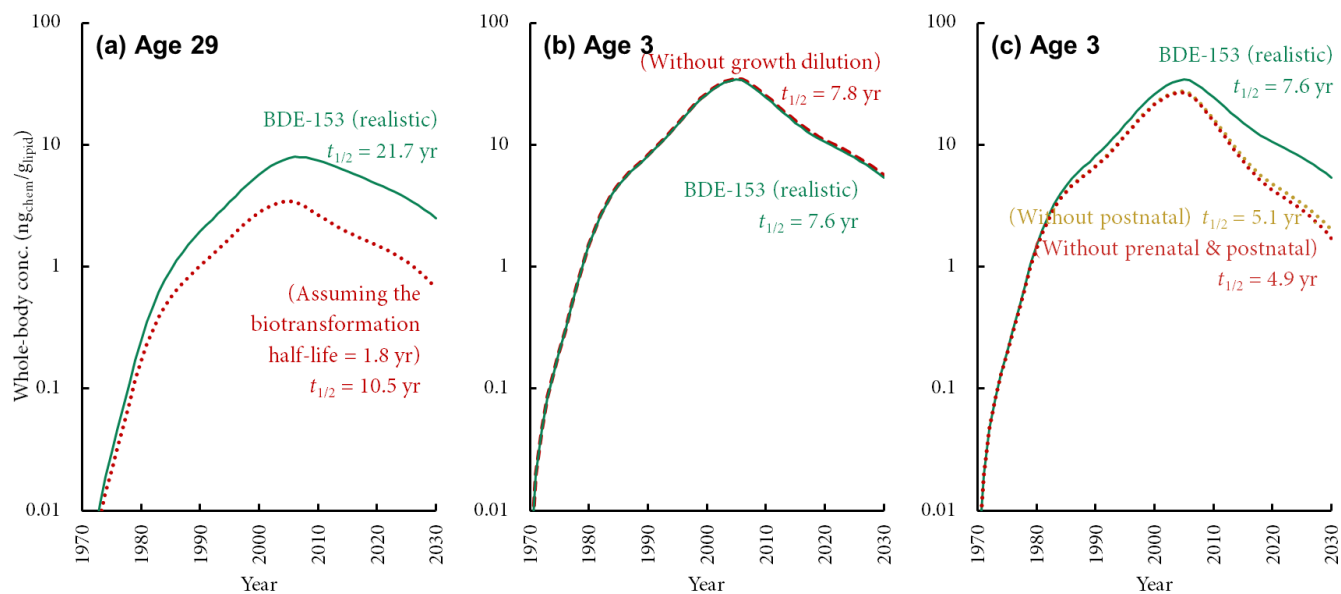

## References for the Supporting Information

1. Schenker, U.; Soltermann, F.; Scheringer, M.; Hungerbühler, K., Modeling the environmental fate of polybrominated diphenyl ethers (PBDEs): The importance of photolysis for the formation of lighter PBDEs. *Environ. Sci. Technol.* **2008**, *42*, (24), 9244-9249.
2. Zhang, X.; Diamond, M. L.; Robson, M.; Harrad, S., Sources, emissions, and fate of polybrominated diphenyl ethers and polychlorinated biphenyls indoors in Toronto, Canada. *Environ. Sci. Technol.* **2011**, *45*, (8), 3268-3274.
3. Brown, T. N.; Arnot, J. A.; Wania, F., Iterative fragment selection: A group contribution approach to predicting fish biotransformation half-lives. *Environ. Sci. Technol.* **2012**, *46*, (15), 8253-8260.
4. Tomy, G. T.; Palace, V. P.; Halldorson, T.; Braekevelt, E.; Danell, R.; Wautier, K.; Evans, B.; Brinkworth, L.; Fisk, A. T., Bioaccumulation, biotransformation, and biochemical effects of brominated diphenyl ethers in juvenile Lake Trout (*Salvelinus namaycush*). *Environ. Sci. Technol.* **2004**, *38*, (5), 1496-1504.
5. Arnot, J. A.; Brown, T. N.; Wania, F., Estimating screening-level organic chemical half-lives in humans. *Environ. Sci. Technol.* **2013**, *48*, (1), 723-730.
6. Abbasi, G.; Buser, A. M.; Soehl, A.; Murray, M. W.; Diamond, M. L., Stocks and flows of PBDEs in products from use to waste in the US and Canada from 1970 to 2020. *Environ. Sci. Technol.* **2015**, *49*, (3), 1521-1528.
7. Abbasi, G.; Li, L.; Breivik, K., Global historical stocks and emissions of PBDEs. *Environ. Sci. Technol.* **2019**, *53*, (11), 6330-6340.
8. U.S. Environmental Protection Agency *An Exposure Assessment of Polybrominated Diphenyl Ethers (EPA/600/R-08/086F)*; National Center for Environmental Assessment, Office of Research and Development: Washington, DC, 2010.
9. Prevedouros, K.; Jones, K. C.; Sweetman, A. J., Estimation of the production, consumption, and atmospheric emissions of pentabrominated diphenyl ether in Europe between 1970 and 2000. *Environ. Sci. Technol.* **2004**, *38*, (12), 3224-3231.
10. Sakai, S.-i.; Hirai, Y.; Aizawa, H.; Ota, S.; Muroishi, Y., Emission inventory of deca-brominated diphenyl ether (DBDE) in Japan. *J. Mater. Cycles Waste Manag.* **2006**, *8*, (1), 56-62.
11. Li, L.; Arnot, J. A.; Wania, F., Revisiting the contributions of far- and near-field routes to aggregate human exposure to polychlorinated biphenyls (PCBs). *Environ. Sci. Technol.* **2018**, *52*, (12), 6974-6984.
12. Richardson, G. M.; Stantec Consulting Ltd. *2013 Canadian Exposure Factors Handbook*; Toxicology Centre, University of Saskatchewan: Saskatoon, 2013.
13. Health Canada *Canadian Environmental Protection Act: Human Health Risk Assessment for Priority Substances*; Health Canada: Ottawa, 1994.
14. Li, L.; Westgate, J. N.; Hughes, L.; Zhang, X.; Givhechi, B.; Toose, L.; Armitage, J. M.; Wania, F.; Egeghy, P.; Arnot, J. A., A model for risk-based screening and prioritization of human exposure to chemicals from near-field sources. *Environ. Sci. Technol.* **2018**, *52*, (24), 14235-14244.
15. Webster, E.; Mackay, D.; Di Guardo, A.; Kane, D.; Woodfine, D., Regional differences in chemical fate model outcome. *Chemosphere* **2004**, *55*, (10), 1361-1376.
16. Wilford, B. H.; Harner, T.; Zhu, J.; Shoeib, M.; Jones, K. C., Passive sampling survey of polybrominated diphenyl ether flame retardants in indoor and outdoor air in Ottawa, Canada: implications for sources and

- exposure. *Environ. Sci. Technol.* **2004**, *38*, (20), 5312-5318.
17. Venier, M.; Audy, O.; Vojta, Š.; Bečanová, J.; Romanak, K.; Melymuk, L.; Krátká, M.; Kukučka, P.; Okeme, J.; Saini, A., Brominated flame retardants in the indoor environment — Comparative study of indoor contamination from three countries. *Environ. Int.* **2016**, *94*, 150-160.
  18. Okeme, J. O.; Yang, C.; Abdollahi, A.; Dhal, S.; Harris, S. A.; Jantunen, L. M.; Tsirlin, D.; Diamond, M. L., Passive air sampling of flame retardants and plasticizers in Canadian homes using PDMS, XAD-coated PDMS and PUF samplers. *Environ. Pollut.* **2018**, *239*, 109-117.
  19. Harner, T.; Shoeib, M.; Diamond, M.; Ikonomou, M.; Stern, G., Passive sampler derived air concentrations of PBDEs along an urban–rural transect: spatial and temporal trends. *Chemosphere* **2006**, *64*, (2), 262-267.
  20. Shoeib, M.; Ahrens, L.; Jantunen, L.; Harner, T., Concentrations in air of organobromine, organochlorine and organophosphate flame retardants in Toronto, Canada. *Atmos. Environ.* **2014**, *99*, 140-147.
  21. Gouin, T.; Thomas, G.; Chaemfa, C.; Harner, T.; Mackay, D.; Jones, K., Concentrations of decabromodiphenyl ether in air from Southern Ontario: Implications for particle-bound transport. *Chemosphere* **2006**, *64*, (2), 256-261.
  22. Shunthirasingham, C.; Alexandrou, N.; Brice, K. A.; Dryfhout-Clark, H.; Su, K.; Shin, C.; Park, R.; Pajda, A.; Noronha, R.; Hung, H., Temporal trends of halogenated flame retardants in the atmosphere of the Canadian Great Lakes Basin (2005–2014). *Environ. Sci.: Processes Impacts* **2018**, *20*, (3), 469-479.
  23. Ikonomou, M. G.; Rayne, S.; Fischer, M.; Fernandez, M. P.; Cretney, W., Occurrence and congener profiles of polybrominated diphenyl ethers (PBDEs) in environmental samples from coastal British Columbia, Canada. *Chemosphere* **2002**, *46*, (5), 649-663.
  24. Easton, M.; Luszniak, D.; Von der Geest, E., Preliminary examination of contaminant loadings in farmed salmon, wild salmon and commercial salmon feed. *Chemosphere* **2002**, *46*, (7), 1053-1074.
  25. Ikonomou, M. G.; Teas, H. J.; Gerlach, R.; Higgs, D.; Addison, R. F., Residues of PBDEs in northeastern Pacific marine fish: Evidence for spatial and temporal trends. *Environ. Toxicol. Chem.* **2011**, *30*, (6), 1261-1271.
